# Supplementary material
Source: PubMed Central journal article supplement (PMC6851483)
Supplement: NIHMS1537268-supplement-1.pdf [file NIHMS1537268-supplement-1.pdf]

## Supporting Information

### Supporting Texts

#### **Text S1. The training sets of TripletRes and ResTriplet.**

TripletRes and ResTriplet were trained on a subset of domain sequences from the SCOPe 2.07 database<sup>1</sup>, which was collected using following filters: (1) Sequence length should be in the range of 30-400; (2) Resolution of the corresponding PDB structure should be better than 2.0 Å; (3) Maximum pairwise sequence identity is set to 30%. These resulted in 7,671 non-redundant domains that are used for training our pipelines.

## Supporting Figures

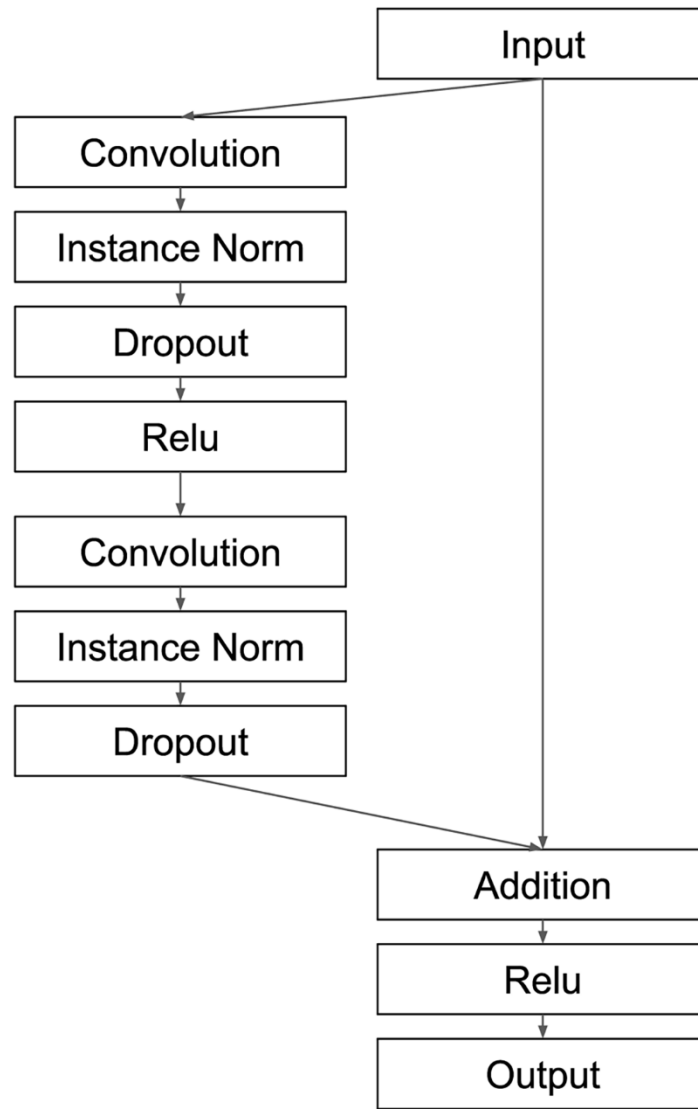

**Figure S1.** The architecture of a basic residual block.

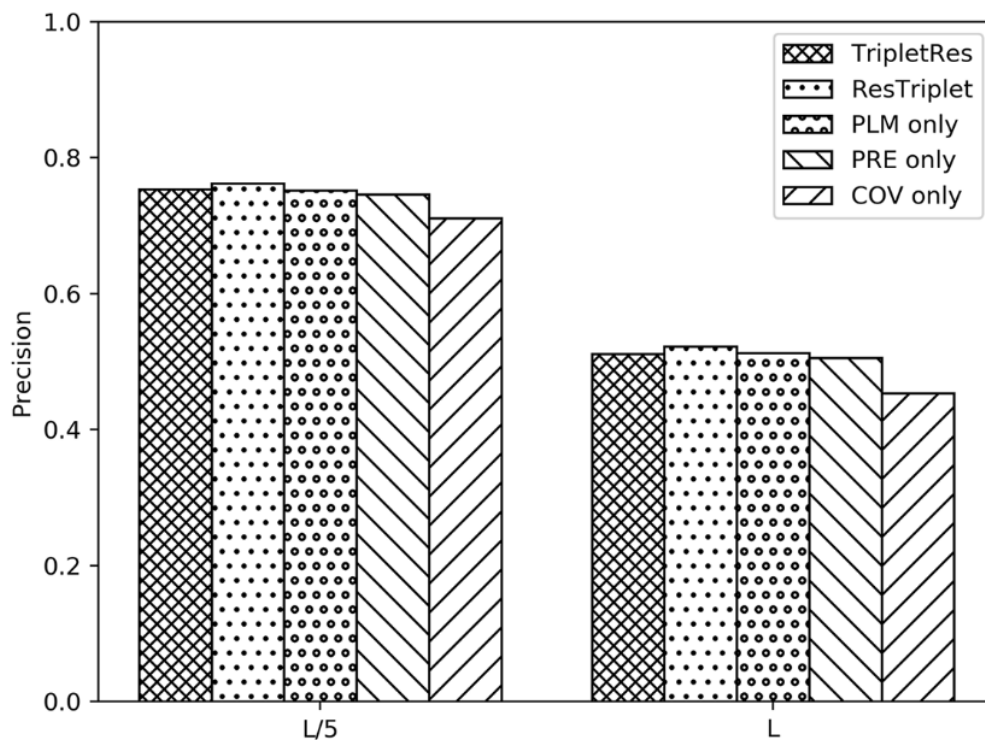

**Figure S2.** Mean precisions of long-range top L and top L/5 contacts of TripletRes and ResTriplet on all CASP13 targets, compared to the predictors trained on the component features from the covariance matrix feature (COV), the precision matrix feature (PRE) and the coupling matrix of the inverse Potts model feature (PLM).

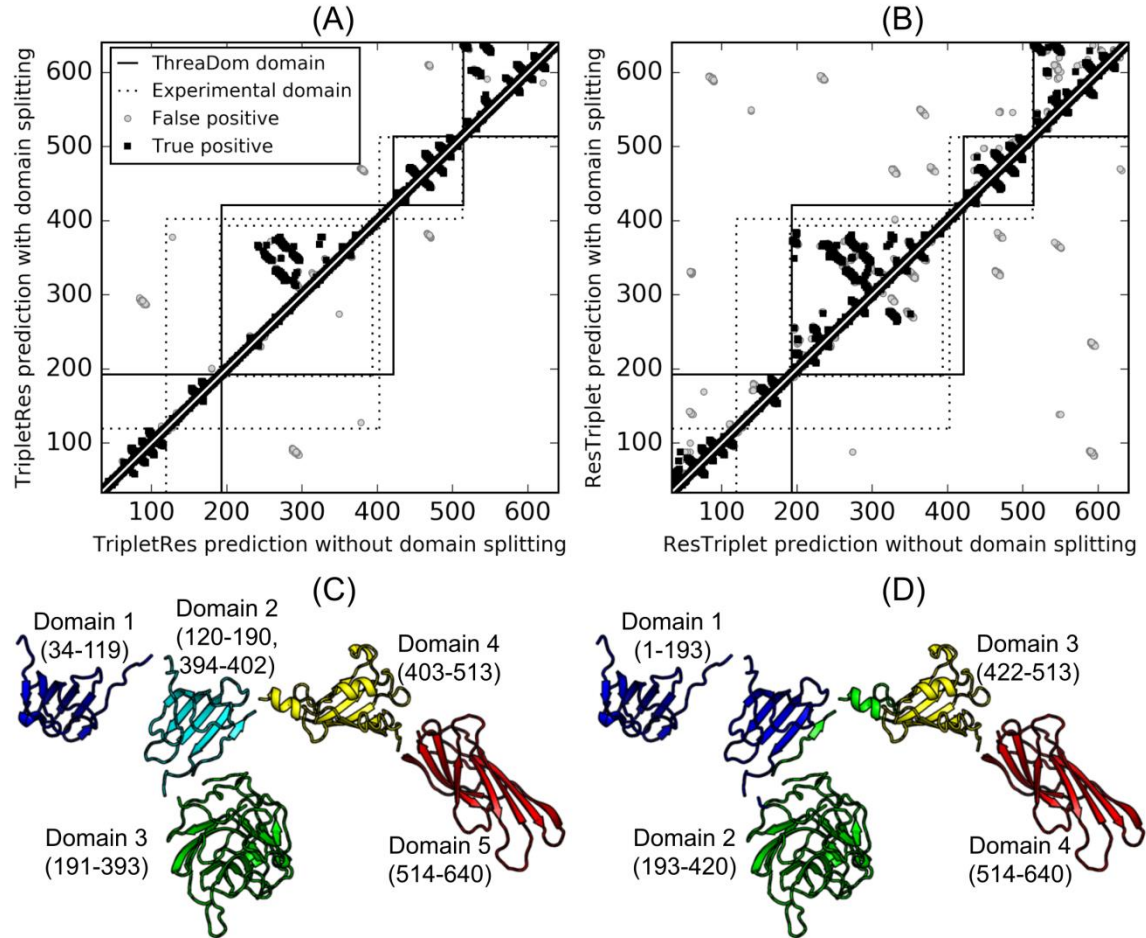

**Figure S3.** Domain partitioning and contact prediction results for T0981 in CASP13. **(A)** Contact prediction by TripletRes with domain partitioning versus those without domain partitioning. Grey and black dots are false and true positive predictions respectively, and solid and dotted lines mark the domain boundaries by ThreaDom and experimental assignments, respectively. **(B)** Same as **(A)** but for ResTriplet. **(C)** Domain partitioning from experimental structure. **(D)** Domain partitioning by ThreaDom prediction.

## Supporting Tables

**Table SI.** Summary of contact-map predictions by ResTriplet and TripletRes on all 122 domains in CASP13.

| Method     | Target     | Type*    | Nf     | Short  |        |        | Medium |        |        | Long   |        |        |
|------------|------------|----------|--------|--------|--------|--------|--------|--------|--------|--------|--------|--------|
|            |            |          |        | L      | L/2    | L/5    | L      | L/2    | L/5    | L      | L/2    | L/5    |
| ResTriplet | T0949-D1   | FM/TBM   | 282.0  | 0.2014 | 0.3188 | 0.5926 | 0.3525 | 0.5797 | 0.9630 | 0.8705 | 1.0000 | 1.0000 |
|            | T0950-D1   | FM       | 10.2   | 0.0585 | 0.0760 | 0.1765 | 0.1140 | 0.1988 | 0.4559 | 0.5088 | 0.7427 | 0.9412 |
|            | T0951-D1   | TBM-easy | 2104.7 | 0.3008 | 0.5038 | 0.7925 | 0.2556 | 0.4887 | 0.8679 | 0.8835 | 0.9624 | 1.0000 |
|            | T0953s1-D1 | FM       | 17.6   | 0.6418 | 0.9394 | 1.0000 | 0.2985 | 0.5758 | 0.9231 | 0.0000 | 0.0000 | 0.0000 |
|            | T0953s2-D1 | FM/TBM   | 102.6  | 0.0909 | 0.0000 | 0.0000 | 0.1136 | 0.1818 | 0.2500 | 0.2500 | 0.4091 | 0.5000 |
|            | T0953s2-D2 | FM       | 64.6   | 0.1029 | 0.1961 | 0.4250 | 0.2108 | 0.3922 | 0.5500 | 0.7745 | 0.8725 | 0.9750 |
|            | T0953s2-D3 | FM       | 70.6   | 0.6364 | 0.7895 | 0.9333 | 0.5455 | 0.6579 | 0.6667 | 0.6623 | 0.8421 | 0.8667 |
|            | T0954-D1   | TBM-hard | 1678.7 | 0.5322 | 0.7953 | 0.8824 | 0.6696 | 0.7895 | 0.8529 | 0.3743 | 0.5088 | 0.5441 |
|            | T0955-D1   | FM/TBM   | 0.2    | 0.5610 | 0.9000 | 0.8750 | 0.5610 | 0.8000 | 1.0000 | 0.0976 | 0.2000 | 0.2500 |
|            | T0957s1-D1 | FM       | 6.7    | 0.3148 | 0.6049 | 1.0000 | 0.3333 | 0.5926 | 0.9062 | 0.3025 | 0.4198 | 0.5938 |
|            | T0957s1-D2 | TBM-hard | 9.4    | 0.1296 | 0.2222 | 0.3000 | 0.1296 | 0.2593 | 0.7000 | 0.5185 | 0.7778 | 1.0000 |
|            | T0957s2-D1 | FM       | 4.7    | 0.2129 | 0.3636 | 0.5484 | 0.2452 | 0.4545 | 0.6774 | 0.3419 | 0.4805 | 0.6129 |
|            | T0958-D1   | FM/TBM   | 2.9    | 0.1948 | 0.3947 | 0.7333 | 0.2727 | 0.4474 | 0.6000 | 0.3636 | 0.3947 | 0.5333 |
|            | T0959-D1   | TBM-hard | 418.7  | 0.2116 | 0.3511 | 0.6757 | 0.3228 | 0.4894 | 0.6757 | 0.5714 | 0.7553 | 0.8108 |
|            | T0960-D1   | NE       | 6.9    | 0.0000 | 0.0000 | 0.0000 | 0.0000 | 0.0000 | 0.0000 | 0.0000 | 0.0000 | 0.0000 |
|            | T0960-D2   | FM       | 4.3    | 0.2976 | 0.4048 | 0.6875 | 0.4286 | 0.5714 | 0.9375 | 0.0595 | 0.0714 | 0.1250 |
|            | T0960-D3   | TBM-hard | 4.1    | 0.3708 | 0.6818 | 1.0000 | 0.6292 | 0.8636 | 1.0000 | 0.2472 | 0.3864 | 0.7059 |
|            | T0960-D4   | NE       | 4.9    | 0.1094 | 0.1562 | 0.3333 | 0.0156 | 0.0312 | 0.0833 | 0.0000 | 0.0000 | 0.0000 |
|            | T0960-D5   | TBM-easy | 7.6    | 0.3333 | 0.4423 | 0.7143 | 0.4000 | 0.5192 | 0.6667 | 0.8381 | 0.8846 | 0.9524 |
|            | T0961-D1   | TBM-easy | 514.1  | 0.2624 | 0.4622 | 0.7200 | 0.2803 | 0.5259 | 0.9100 | 0.8072 | 0.9124 | 0.9900 |
|            | T0962-D1   | TBM-easy | 225.1  | 0.4463 | 0.6477 | 0.9429 | 0.3785 | 0.5795 | 0.8286 | 0.6102 | 0.8864 | 0.9143 |
|            | T0963-D1   | NE       | 38.1   | 0.0000 | 0.0000 | 0.0000 | 0.0000 | 0.0000 | 0.0000 | 0.0000 | 0.0000 | 0.0000 |
|            | T0963-D2   | FM       | 23.4   | 0.4268 | 0.7317 | 0.9375 | 0.7683 | 0.9024 | 0.9375 | 0.1098 | 0.1951 | 0.3125 |
|            | T0963-D3   | TBM-hard | 22.0   | 0.3978 | 0.7174 | 1.0000 | 0.6882 | 0.8261 | 1.0000 | 0.2581 | 0.4348 | 0.7778 |
|            | T0963-D4   | NE       | 244.6  | 0.2656 | 0.3125 | 0.4167 | 0.0469 | 0.0625 | 0.0000 | 0.0000 | 0.0000 | 0.0000 |
|            | T0963-D5   | TBM-easy | 201.8  | 0.2872 | 0.4894 | 0.5556 | 0.2660 | 0.3830 | 0.5556 | 0.7128 | 0.7872 | 0.8889 |
|            | T0964-D1   | TBM-hard | 56.6   | 0.5474 | 0.8511 | 1.0000 | 0.4421 | 0.7021 | 0.9474 | 0.8632 | 0.9787 | 0.9474 |
|            | T0965-D1   | TBM-hard | 2469.8 | 0.2236 | 0.4231 | 0.7258 | 0.3003 | 0.5513 | 0.9032 | 0.8594 | 0.9231 | 1.0000 |
|            | T0966-D1   | TBM-hard | 2.0    | 0.2398 | 0.4350 | 0.7755 | 0.2439 | 0.4431 | 0.8061 | 0.6362 | 0.8049 | 0.9388 |
|            | T0967-D1   | TBM-easy | 851.5  | 0.2405 | 0.4615 | 0.8667 | 0.5190 | 0.9231 | 1.0000 | 0.7215 | 0.8205 | 1.0000 |
|            | T0968s1-D1 | FM       | 16.0   | 0.3644 | 0.6610 | 0.9565 | 0.5339 | 0.8814 | 1.0000 | 0.2881 | 0.3559 | 0.3913 |
|            | T0968s2-D1 | FM       | 33.0   | 0.6435 | 0.9298 | 1.0000 | 0.7304 | 0.8070 | 0.9565 | 0.2957 | 0.3333 | 0.4783 |
|            | T0969-D1   | FM       | 87.3   | 0.2090 | 0.3503 | 0.5286 | 0.2655 | 0.4407 | 0.7143 | 0.7401 | 0.8701 | 0.9571 |
|            | T0970-D1   | FM/TBM   | 12.9   | 0.2990 | 0.4583 | 0.6316 | 0.4433 | 0.6667 | 0.8947 | 0.5876 | 0.8333 | 0.8947 |
|            | T0971-D1   | TBM-easy | 1280.0 | 0.4231 | 0.7231 | 0.9615 | 0.7231 | 0.9846 | 1.0000 | 0.7000 | 0.9538 | 1.0000 |
|            | T0973-D1   | TBM-easy | 40.7   | 0.2740 | 0.5342 | 0.8621 | 0.6164 | 0.8904 | 1.0000 | 0.4041 | 0.6301 | 0.9655 |
|            | T0974s1-D1 | TBM-easy | 4576.9 | 0.3043 | 0.5882 | 1.0000 | 0.1594 | 0.2647 | 0.6154 | 0.3768 | 0.6176 | 0.8462 |
|            | T0974s2-D1 | NE       | 4174.0 | 0.3500 | 0.6000 | 0.8125 | 0.2375 | 0.4250 | 0.8125 | 0.3750 | 0.5750 | 0.8125 |
|            | T0975-D1   | FM       | 387.2  | 0.2150 | 0.3699 | 0.7759 | 0.2150 | 0.4041 | 0.7241 | 0.4539 | 0.5890 | 0.7241 |
|            | T0976-D1   | TBM-easy | 2060.0 | 0.1750 | 0.3500 | 0.6667 | 0.3750 | 0.7167 | 0.9583 | 0.8917 | 1.0000 | 1.0000 |
|            | T0976-D2   | TBM-easy | 424.9  | 0.1935 | 0.3871 | 0.7917 | 0.3790 | 0.6935 | 1.0000 | 0.8629 | 0.9839 | 1.0000 |
|            | T0977-D1   | TBM-easy | 24.5   | 0.5017 | 0.8533 | 0.9833 | 0.7442 | 0.9533 | 0.9667 | 0.4419 | 0.5800 | 0.7500 |
| T0977-D2   | TBM-easy   | 2.3      | 0.3627 | 0.6078 | 0.9500 | 0.6912 | 0.9020 | 0.9750 | 0.2304 | 0.3529 | 0.6500 |        |
| T0978-D1   | FM/TBM     | 183.2    | 0.1671 | 0.2427 | 0.3049 | 0.2228 | 0.3495 | 0.5732 | 0.4843 | 0.7039 | 0.8659 |        |
| T0979-D1   | TBM-hard   | 631.8    | 0.0000 | 0.0000 | 0.0000 | 0.0000 | 0.0000 | 0.0000 | 0.0000 | 0.0000 | 0.0000 |        |
| T0980s1-D1 | FM         | 7.6      | 0.2952 | 0.5000 | 0.7619 | 0.3524 | 0.5000 | 0.7143 | 0.3619 | 0.5192 | 0.9048 |        |
| T0980s2-D1 | NE         | 6.0      | 0.1290 | 0.2667 | 0.0000 | 0.0000 | 0.0000 | 0.0000 | 0.0000 | 0.0000 | 0.0000 |        |
| T0981-D1   | TBM-hard   | 14.1     | 0.4884 | 0.6279 | 0.7647 | 0.6628 | 0.6279 | 0.9412 | 0.1395 | 0.2326 | 0.2941 |        |
| T0981-D2   | FM         | 0.6      | 0.0989 | 0.1773 | 0.3929 | 0.2544 | 0.3475 | 0.6071 | 0.0636 | 0.0638 | 0.0714 |        |
| T0981-D3   | FM/TBM     | 242.8    | 0.1823 | 0.2871 | 0.4500 | 0.3547 | 0.4851 | 0.6000 | 0.8177 | 0.9208 | 1.0000 |        |
| T0981-D4   | TBM-hard   | 0.5      | 0.4054 | 0.5455 | 0.5909 | 0.5946 | 0.8545 | 1.0000 | 0.2523 | 0.4182 | 0.9091 |        |
| T0981-D5   | TBM-hard   | 2.8      | 0.4016 | 0.6349 | 0.9200 | 0.5276 | 0.7619 | 0.9200 | 0.6693 | 0.8095 | 0.9600 |        |
| T0982-D1   | TBM-easy   | 204.8    | 0.5111 | 0.7910 | 0.9630 | 0.6889 | 0.8806 | 0.9630 | 0.6815 | 0.8806 | 0.9630 |        |

|            |          |        |        |        |        |        |        |        |        |        |        |
|------------|----------|--------|--------|--------|--------|--------|--------|--------|--------|--------|--------|
| T0982-D2   | TBM-hard | 207.1  | 0.4091 | 0.6061 | 0.8846 | 0.4470 | 0.6818 | 0.9615 | 0.4242 | 0.4697 | 0.3846 |
| T0983-D1   | TBM-easy | 644.8  | 0.3178 | 0.6017 | 1.0000 | 0.6695 | 0.9576 | 1.0000 | 0.8475 | 0.9746 | 1.0000 |
| T0984-D1   | TBM-easy | 186.2  | 0.0982 | 0.1964 | 0.3333 | 0.1027 | 0.1511 | 0.2576 | 0.3384 | 0.5227 | 0.7576 |
| T0984-D2   | TBM-easy | 344.7  | 0.0408 | 0.0822 | 0.2069 | 0.0680 | 0.1370 | 0.1724 | 0.3946 | 0.5205 | 0.7586 |
| T0985-D1   | TBM-hard | 193.6  | 0.3610 | 0.5629 | 0.7976 | 0.3337 | 0.5083 | 0.7262 | 0.5914 | 0.6912 | 0.7321 |
| T0986s1-D1 | FM/TBM   | 52.2   | 0.5217 | 0.7174 | 1.0000 | 0.3696 | 0.6304 | 0.8333 | 0.3261 | 0.5000 | 0.7222 |
| T0986s2-D1 | FM       | 5.7    | 0.3226 | 0.4805 | 0.7419 | 0.3355 | 0.5974 | 0.8387 | 0.5613 | 0.7013 | 0.8710 |
| T0987-D1   | FM       | 3.5    | 0.2757 | 0.4891 | 0.7568 | 0.3135 | 0.5217 | 0.7027 | 0.7081 | 0.9348 | 1.0000 |
| T0987-D2   | FM       | 3.3    | 0.2029 | 0.3592 | 0.5122 | 0.2947 | 0.4563 | 0.7561 | 0.5459 | 0.7573 | 0.9024 |
| T0989-D1   | FM       | 1.7    | 0.2761 | 0.3582 | 0.6923 | 0.3507 | 0.5970 | 0.8462 | 0.2761 | 0.4478 | 0.8462 |
| T0989-D2   | FM       | 1.9    | 0.2589 | 0.4643 | 0.9091 | 0.3036 | 0.4464 | 0.7273 | 0.1339 | 0.1607 | 0.1818 |
| T0990-D1   | FM       | 4.0    | 0.1842 | 0.3421 | 0.6000 | 0.2895 | 0.3421 | 0.6667 | 0.3553 | 0.5263 | 0.6000 |
| T0990-D2   | FM       | 2.3    | 0.0946 | 0.1802 | 0.3864 | 0.1059 | 0.1712 | 0.3864 | 0.2005 | 0.3063 | 0.5227 |
| T0990-D3   | FM       | 2.4    | 0.2488 | 0.3774 | 0.5476 | 0.1502 | 0.2547 | 0.4048 | 0.2441 | 0.3679 | 0.6429 |
| T0991-D1   | FM       | 0.3    | 0.3136 | 0.4746 | 0.7391 | 0.4661 | 0.5763 | 0.8261 | 0.2881 | 0.4915 | 0.5652 |
| T0992-D1   | FM/TBM   | 179.4  | 0.5607 | 0.8868 | 1.0000 | 0.6168 | 0.8113 | 0.9048 | 0.7477 | 0.9245 | 1.0000 |
| T0993s1-D1 | TBM-easy | 2441.1 | 0.3346 | 0.6183 | 1.0000 | 0.3612 | 0.6336 | 0.9231 | 0.8403 | 0.9618 | 1.0000 |
| T0993s2-D1 | TBM-easy | 1548.8 | 0.1327 | 0.2653 | 0.2105 | 0.2551 | 0.2653 | 0.2632 | 0.7449 | 0.8980 | 1.0000 |
| T0995-D1   | TBM-easy | 632.4  | 0.3231 | 0.5850 | 0.9138 | 0.3673 | 0.6190 | 0.8966 | 0.8435 | 0.9388 | 1.0000 |
| T0996-D1   | TBM-easy | 362.5  | 0.2710 | 0.4717 | 0.9524 | 0.4019 | 0.7170 | 0.9524 | 0.7477 | 0.9623 | 1.0000 |
| T0996-D2   | TBM-easy | 332.7  | 0.2520 | 0.5079 | 0.7600 | 0.3228 | 0.6190 | 0.9600 | 0.8189 | 0.9524 | 1.0000 |
| T0996-D3   | TBM-easy | 375.0  | 0.2500 | 0.4400 | 0.8500 | 0.4500 | 0.7000 | 0.9000 | 0.6200 | 0.8800 | 1.0000 |
| T0996-D4   | TBM-easy | 55.8   | 0.2857 | 0.5152 | 1.0000 | 0.3459 | 0.6212 | 1.0000 | 0.7519 | 0.9697 | 1.0000 |
| T0996-D5   | TBM-easy | 216.3  | 0.2645 | 0.5000 | 0.8333 | 0.3719 | 0.6500 | 0.9583 | 0.6364 | 0.8500 | 0.8333 |
| T0996-D6   | TBM-easy | 233.3  | 0.3365 | 0.5769 | 0.9500 | 0.4423 | 0.8269 | 0.9500 | 0.7404 | 0.9423 | 1.0000 |
| T0996-D7   | TBM-easy | 201.1  | 0.2429 | 0.4571 | 0.8214 | 0.3214 | 0.6000 | 0.9286 | 0.8000 | 0.9571 | 1.0000 |
| T0997-D1   | FM/TBM   | 172.5  | 0.3730 | 0.5543 | 0.7568 | 0.5784 | 0.8587 | 0.8919 | 0.7351 | 0.8587 | 0.9459 |
| T0998-D1   | FM       | 0.7    | 0.2470 | 0.3735 | 0.4545 | 0.3795 | 0.5904 | 0.6970 | 0.1867 | 0.1807 | 0.0909 |
| T0999-D1   | NE       | 11.1   | 0.2306 | 0.4041 | 0.6234 | 0.2073 | 0.3212 | 0.5584 | 0.6036 | 0.7979 | 0.9870 |
| T0999-D2   | TBM-hard | 10.3   | 0.2914 | 0.5664 | 0.9333 | 0.3819 | 0.6504 | 0.8778 | 0.8565 | 0.9071 | 0.9000 |
| T0999-D3   | TBM-easy | 16.3   | 0.1667 | 0.3333 | 0.6667 | 0.1278 | 0.2333 | 0.3889 | 0.6778 | 0.8444 | 0.9444 |
| T0999-D4   | TBM-easy | 321.3  | 0.2623 | 0.4262 | 0.6875 | 0.3402 | 0.5492 | 0.7708 | 0.8074 | 0.9180 | 0.9792 |
| T0999-D5   | TBM-easy | 295.7  | 0.2222 | 0.3889 | 0.7895 | 0.4271 | 0.7222 | 1.0000 | 0.8715 | 0.9861 | 1.0000 |
| T1000-D1   | NE       | 297.0  | 0.3855 | 0.7805 | 0.9375 | 0.6506 | 0.9268 | 0.9375 | 0.8554 | 0.9512 | 1.0000 |
| T1000-D2   | FM       | 186.7  | 0.1740 | 0.3349 | 0.6628 | 0.3109 | 0.6000 | 0.8953 | 0.8329 | 0.9116 | 0.9651 |
| T1001-D1   | FM       | 2.0    | 0.3309 | 0.5362 | 0.7407 | 0.4676 | 0.5942 | 0.7778 | 0.2158 | 0.2754 | 0.0741 |
| T1002-D1   | TBM-easy | 410.7  | 0.5593 | 1.0000 | 1.0000 | 0.6441 | 0.8966 | 1.0000 | 0.7627 | 0.7586 | 0.7273 |
| T1002-D2   | TBM-easy | 410.7  | 0.6102 | 1.0000 | 1.0000 | 0.6441 | 0.8276 | 1.0000 | 0.6271 | 0.8276 | 1.0000 |
| T1002-D3   | TBM-easy | 262.9  | 0.4306 | 0.7361 | 1.0000 | 0.4653 | 0.7639 | 0.9643 | 0.8611 | 0.9861 | 1.0000 |
| T1003-D1   | TBM-easy | 1508.2 | 0.3272 | 0.5046 | 0.8506 | 0.2609 | 0.4541 | 0.7701 | 0.7849 | 0.9725 | 0.9770 |
| T1004-D1   | TBM-easy | 35.2   | 0.4186 | 0.7674 | 1.0000 | 0.8721 | 1.0000 | 1.0000 | 0.3023 | 0.4419 | 0.7647 |
| T1004-D2   | TBM-easy | 37.2   | 0.4805 | 0.8158 | 1.0000 | 0.7403 | 0.8947 | 1.0000 | 0.1429 | 0.2632 | 0.4667 |
| T1004-D3   | NE       | 3.0    | 0.3348 | 0.4696 | 0.7174 | 0.4870 | 0.5913 | 0.8478 | 0.2609 | 0.4174 | 0.6739 |
| T1005-D1   | FM/TBM   | 261.6  | 0.1810 | 0.2577 | 0.3692 | 0.1656 | 0.2454 | 0.5231 | 0.6810 | 0.9080 | 0.9538 |
| T1006-D1   | TBM-easy | 897.9  | 0.2468 | 0.5000 | 0.9333 | 0.5844 | 0.9474 | 1.0000 | 0.8831 | 0.9737 | 1.0000 |
| T1008-D1   | FM/TBM   | 0.1    | 0.3506 | 0.5000 | 0.6000 | 0.1948 | 0.2895 | 0.2000 | 0.3896 | 0.5263 | 0.6000 |
| T1009-D1   | TBM-hard | 262.9  | 0.3691 | 0.5822 | 0.8462 | 0.2841 | 0.4958 | 0.7902 | 0.7981 | 0.9220 | 0.9510 |
| T1010-D1   | FM       | 20.4   | 0.2667 | 0.4190 | 0.7381 | 0.4476 | 0.6190 | 0.8810 | 0.5238 | 0.6571 | 0.8095 |
| T1011-D1   | TBM-hard | 227.9  | 0.0558 | 0.1116 | 0.2258 | 0.0515 | 0.1030 | 0.2258 | 0.4893 | 0.7253 | 0.9247 |
| T1011-D2   | NE       | 144.9  | 0.3500 | 0.5875 | 0.9688 | 0.3063 | 0.5000 | 0.7812 | 0.5312 | 0.7125 | 0.9062 |
| T1013-D1   | TBM-easy | 316.0  | 0.0846 | 0.1653 | 0.3936 | 0.0825 | 0.1653 | 0.4043 | 0.5159 | 0.7500 | 0.8617 |
| T1014-D1   | TBM-easy | 1007.0 | 0.2453 | 0.4937 | 0.8710 | 0.4088 | 0.7089 | 0.9032 | 0.8616 | 0.9494 | 1.0000 |
| T1014-D2   | TBM-easy | 4383.8 | 0.2821 | 0.4483 | 0.6957 | 0.5128 | 0.6724 | 0.6957 | 0.5897 | 0.7069 | 0.9130 |
| T1015s1-D1 | FM       | 43.9   | 0.4318 | 0.7955 | 1.0000 | 0.2841 | 0.5000 | 0.8824 | 0.5341 | 0.8636 | 0.9412 |
| T1015s2-D1 | TBM-hard | 62.8   | 0.3178 | 0.5625 | 0.8400 | 0.3798 | 0.6875 | 0.9600 | 0.6667 | 0.8281 | 0.9600 |
| T1016-D1   | TBM-easy | 1340.9 | 0.2574 | 0.5050 | 0.8500 | 0.4257 | 0.7525 | 0.9500 | 0.8762 | 0.9703 | 0.9500 |
| T1017s1-D1 | TBM-easy | 25.5   | 0.2000 | 0.3818 | 0.5909 | 0.2545 | 0.4364 | 0.7727 | 0.4727 | 0.6182 | 1.0000 |
| T1017s2-D1 | FM       | 14.7   | 0.4219 | 0.6250 | 0.9600 | 0.5859 | 0.8438 | 1.0000 | 0.2812 | 0.4062 | 0.6800 |
| T1018-D1   | TBM-easy | 386.9  | 0.2455 | 0.4371 | 0.7121 | 0.3353 | 0.6228 | 0.8182 | 0.8443 | 0.9341 | 0.9848 |
| T1019s1-D1 | FM/TBM   | 254.7  | 0.7759 | 0.9655 | 1.0000 | 0.5862 | 0.6897 | 0.8182 | 0.2586 | 0.3793 | 0.7273 |
| T1019s2-D1 | TBM-easy | 129.0  | 0.4545 | 0.7727 | 1.0000 | 0.6250 | 0.9091 | 1.0000 | 0.3523 | 0.5682 | 0.7647 |
| T1020-D1   | TBM-easy | 119.8  | 0.1087 | 0.2050 | 0.4688 | 0.1863 | 0.3540 | 0.7188 | 0.7640 | 0.9255 | 0.9375 |
| T1021s1-D1 | TBM-hard | 154.3  | 0.2483 | 0.5000 | 0.7931 | 0.4161 | 0.8108 | 0.9655 | 0.6309 | 0.8243 | 1.0000 |

|            |            |          |        |        |        |        |        |        |        |        |        |        |
|------------|------------|----------|--------|--------|--------|--------|--------|--------|--------|--------|--------|--------|
|            | T1021s2-D1 | TBM-hard | 149.2  | 0.2292 | 0.4138 | 0.7246 | 0.2808 | 0.4770 | 0.7246 | 0.7049 | 0.7644 | 0.7246 |
|            | T1021s3-D1 | FM       | 330.0  | 0.1685 | 0.2472 | 0.4286 | 0.2360 | 0.4270 | 0.7714 | 0.7079 | 0.8652 | 1.0000 |
|            | T1021s3-D2 | FM       | 4.7    | 0.2277 | 0.3800 | 0.7000 | 0.2871 | 0.4000 | 0.6500 | 0.2871 | 0.3000 | 0.2500 |
|            | T1022s1-D1 | FM       | 436.0  | 0.2821 | 0.5385 | 0.7419 | 0.5064 | 0.8205 | 0.9677 | 0.6923 | 0.8846 | 0.9355 |
|            | T1022s1-D2 | TBM-hard | 486.3  | 0.0896 | 0.1515 | 0.3846 | 0.3731 | 0.6667 | 0.9231 | 0.5373 | 0.8485 | 0.8462 |
|            | T1022s2-D1 | TBM-hard | 132.5  | 0.3124 | 0.5344 | 0.7333 | 0.4419 | 0.7366 | 0.9810 | 0.5981 | 0.7939 | 0.9238 |
|            | Average    |          |        | 0.2939 | 0.4865 | 0.7170 | 0.3745 | 0.5662 | 0.7625 | 0.5225 | 0.6573 | 0.7621 |
| TripletRes | T0949-D1   | FM/TBM   | 282.0  | 0.1727 | 0.2754 | 0.5926 | 0.3309 | 0.5217 | 1.0000 | 0.8849 | 1.0000 | 1.0000 |
|            | T0950-D1   | FM       | 10.2   | 0.0556 | 0.0760 | 0.1765 | 0.1140 | 0.1988 | 0.4559 | 0.4942 | 0.6725 | 0.8676 |
|            | T0951-D1   | TBM-easy | 2104.7 | 0.3120 | 0.4962 | 0.7736 | 0.2594 | 0.4887 | 0.8491 | 0.8647 | 0.9474 | 0.9811 |
|            | T0953s1-D1 | FM       | 17.6   | 0.6418 | 0.9394 | 1.0000 | 0.2687 | 0.4545 | 0.7692 | 0.0000 | 0.0000 | 0.0000 |
|            | T0953s2-D1 | FM/TBM   | 102.6  | 0.0227 | 0.0000 | 0.0000 | 0.1136 | 0.1818 | 0.2500 | 0.2273 | 0.2727 | 0.6250 |
|            | T0953s2-D2 | FM       | 64.6   | 0.1029 | 0.1961 | 0.4000 | 0.2108 | 0.3333 | 0.5750 | 0.7892 | 0.8922 | 0.9750 |
|            | T0953s2-D3 | FM       | 70.6   | 0.6234 | 0.7632 | 0.8667 | 0.5974 | 0.6316 | 0.7333 | 0.7013 | 0.8684 | 0.9333 |
|            | T0954-D1   | TBM-hard | 1678.7 | 0.5234 | 0.7661 | 0.9412 | 0.6608 | 0.7953 | 0.8382 | 0.3626 | 0.4737 | 0.4706 |
|            | T0955-D1   | FM/TBM   | 0.2    | 0.5610 | 0.8500 | 0.8750 | 0.5854 | 0.9000 | 0.8750 | 0.0976 | 0.1500 | 0.3750 |
|            | T0957s1-D1 | FM       | 6.7    | 0.3148 | 0.5802 | 0.9688 | 0.3333 | 0.5185 | 0.7812 | 0.2840 | 0.3580 | 0.6250 |
|            | T0957s1-D2 | TBM-hard | 9.4    | 0.1111 | 0.2222 | 0.1000 | 0.1296 | 0.2593 | 0.7000 | 0.5000 | 0.7407 | 1.0000 |
|            | T0957s2-D1 | FM       | 4.7    | 0.2129 | 0.3896 | 0.5484 | 0.2452 | 0.4545 | 0.7742 | 0.3935 | 0.4935 | 0.5806 |
|            | T0958-D1   | FM/TBM   | 2.9    | 0.1948 | 0.3947 | 0.6667 | 0.2468 | 0.4211 | 0.6000 | 0.3247 | 0.4737 | 0.8000 |
|            | T0959-D1   | TBM-hard | 418.7  | 0.2063 | 0.3617 | 0.5405 | 0.3280 | 0.4362 | 0.6486 | 0.5926 | 0.7660 | 0.8649 |
|            | T0960-D1   | NE       | 6.9    | 0.0000 | 0.0000 | 0.0000 | 0.0000 | 0.0000 | 0.0000 | 0.0000 | 0.0000 | 0.0000 |
|            | T0960-D2   | FM       | 4.3    | 0.3810 | 0.5000 | 0.7500 | 0.5952 | 0.7619 | 0.8750 | 0.0476 | 0.0714 | 0.1875 |
|            | T0960-D3   | TBM-hard | 4.1    | 0.3820 | 0.7045 | 1.0000 | 0.6517 | 0.8409 | 1.0000 | 0.1798 | 0.3409 | 0.7059 |
|            | T0960-D4   | NE       | 4.9    | 0.1250 | 0.1562 | 0.1667 | 0.0312 | 0.0312 | 0.0000 | 0.0000 | 0.0000 | 0.0000 |
|            | T0960-D5   | TBM-easy | 7.6    | 0.3238 | 0.5192 | 0.6667 | 0.3810 | 0.5385 | 0.7143 | 0.7524 | 0.8269 | 0.9524 |
|            | T0961-D1   | TBM-easy | 514.1  | 0.2644 | 0.4701 | 0.7900 | 0.2803 | 0.5299 | 0.9000 | 0.7873 | 0.8884 | 0.9500 |
|            | T0962-D1   | TBM-easy | 225.1  | 0.4011 | 0.7045 | 0.9714 | 0.3616 | 0.5795 | 0.8571 | 0.6271 | 0.8182 | 0.9429 |
|            | T0963-D1   | NE       | 38.1   | 0.0000 | 0.0000 | 0.0000 | 0.0000 | 0.0000 | 0.0000 | 0.0000 | 0.0000 | 0.0000 |
|            | T0963-D2   | FM       | 23.4   | 0.4390 | 0.7561 | 1.0000 | 0.8293 | 0.9268 | 1.0000 | 0.2439 | 0.3659 | 0.6875 |
|            | T0963-D3   | TBM-hard | 22.0   | 0.3763 | 0.6739 | 1.0000 | 0.7419 | 0.9130 | 0.9444 | 0.2903 | 0.5217 | 0.7778 |
|            | T0963-D4   | NE       | 244.6  | 0.2656 | 0.3438 | 0.5000 | 0.0625 | 0.0938 | 0.1667 | 0.0000 | 0.0000 | 0.0000 |
|            | T0963-D5   | TBM-easy | 201.8  | 0.2979 | 0.4468 | 0.6111 | 0.2447 | 0.3617 | 0.6111 | 0.6915 | 0.7660 | 0.8333 |
|            | T0964-D1   | TBM-hard | 56.6   | 0.2421 | 0.3404 | 0.5263 | 0.1579 | 0.1915 | 0.2105 | 0.2316 | 0.3404 | 0.4737 |
|            | T0965-D1   | TBM-hard | 2469.8 | 0.2204 | 0.4038 | 0.6774 | 0.3035 | 0.5641 | 0.9355 | 0.8275 | 0.8974 | 0.9677 |
|            | T0966-D1   | TBM-hard | 2.0    | 0.2317 | 0.3699 | 0.5510 | 0.2012 | 0.3130 | 0.5408 | 0.4309 | 0.6667 | 0.8367 |
|            | T0967-D1   | TBM-easy | 851.5  | 0.2405 | 0.4615 | 0.8667 | 0.5190 | 0.8974 | 1.0000 | 0.7215 | 0.8205 | 0.9333 |
|            | T0968s1-D1 | FM       | 16.0   | 0.3559 | 0.6441 | 0.9565 | 0.5254 | 0.8644 | 1.0000 | 0.3136 | 0.3898 | 0.5217 |
|            | T0968s2-D1 | FM       | 33.0   | 0.6435 | 0.9123 | 1.0000 | 0.7043 | 0.8596 | 0.8696 | 0.3304 | 0.2982 | 0.2174 |
|            | T0969-D1   | FM       | 87.3   | 0.2119 | 0.3729 | 0.6000 | 0.2571 | 0.4237 | 0.6857 | 0.7288 | 0.8927 | 0.9857 |
|            | T0970-D1   | FM/TBM   | 12.9   | 0.3093 | 0.4375 | 0.5789 | 0.4124 | 0.6458 | 0.9474 | 0.5567 | 0.7708 | 0.8421 |
|            | T0971-D1   | TBM-easy | 1280.0 | 0.4154 | 0.7538 | 1.0000 | 0.7077 | 0.9692 | 0.9615 | 0.7154 | 0.9231 | 0.9231 |
|            | T0973-D1   | TBM-easy | 40.7   | 0.2740 | 0.5068 | 0.8621 | 0.6233 | 0.8493 | 0.9655 | 0.4110 | 0.6301 | 0.8621 |
|            | T0974s1-D1 | TBM-easy | 4576.9 | 0.3043 | 0.5882 | 0.9231 | 0.1594 | 0.3235 | 0.6154 | 0.4058 | 0.6176 | 0.9231 |
|            | T0974s2-D1 | NE       | 4174.0 | 0.3500 | 0.6250 | 0.8125 | 0.2250 | 0.4500 | 0.7500 | 0.3750 | 0.5500 | 0.7500 |
|            | T0975-D1   | FM       | 387.2  | 0.2423 | 0.4384 | 0.7759 | 0.1980 | 0.3767 | 0.7586 | 0.6007 | 0.8082 | 0.8448 |
|            | T0976-D1   | TBM-easy | 2060.0 | 0.1750 | 0.3500 | 0.6667 | 0.3750 | 0.7167 | 1.0000 | 0.8917 | 1.0000 | 1.0000 |
|            | T0976-D2   | TBM-easy | 424.9  | 0.1935 | 0.3871 | 0.7083 | 0.3790 | 0.6935 | 1.0000 | 0.8710 | 1.0000 | 1.0000 |
|            | T0977-D1   | TBM-easy | 24.5   | 0.4917 | 0.8467 | 0.9833 | 0.7342 | 0.9533 | 1.0000 | 0.4518 | 0.6533 | 0.7667 |
|            | T0977-D2   | TBM-easy | 2.3    | 0.3431 | 0.5882 | 0.9000 | 0.7059 | 0.9118 | 0.9250 | 0.2549 | 0.4020 | 0.6500 |
|            | T0978-D1   | FM/TBM   | 183.2  | 0.1768 | 0.2961 | 0.4268 | 0.2252 | 0.3204 | 0.5854 | 0.5206 | 0.7233 | 0.8415 |
|            | T0979-D1   | TBM-hard | 631.8  | 0.0000 | 0.0000 | 0.0000 | 0.0000 | 0.0000 | 0.0000 | 0.0000 | 0.0000 | 0.0000 |
|            | T0980s1-D1 | FM       | 7.6    | 0.2952 | 0.5577 | 0.7143 | 0.3810 | 0.5577 | 0.6190 | 0.3238 | 0.5192 | 0.9524 |
|            | T0980s2-D1 | NE       | 6.0    | 0.1290 | 0.1333 | 0.3333 | 0.0000 | 0.0000 | 0.0000 | 0.0000 | 0.0000 | 0.0000 |
|            | T0981-D1   | TBM-hard | 14.1   | 0.5116 | 0.7907 | 0.8235 | 0.5698 | 0.7209 | 1.0000 | 0.1163 | 0.1163 | 0.1176 |
| T0981-D2   | FM         | 0.6      | 0.0989 | 0.1560 | 0.3393 | 0.2332 | 0.3262 | 0.5000 | 0.0742 | 0.0993 | 0.1429 |        |
| T0981-D3   | FM/TBM     | 242.8    | 0.1429 | 0.2079 | 0.2750 | 0.1773 | 0.1881 | 0.0750 | 0.6749 | 0.9208 | 1.0000 |        |
| T0981-D4   | TBM-hard   | 0.5      | 0.3694 | 0.5455 | 0.9091 | 0.6577 | 0.7818 | 1.0000 | 0.2793 | 0.4000 | 0.7727 |        |
| T0981-D5   | TBM-hard   | 2.8      | 0.3622 | 0.5238 | 0.7600 | 0.5433 | 0.6190 | 0.7600 | 0.8031 | 0.9683 | 1.0000 |        |
| T0982-D1   | TBM-easy   | 204.8    | 0.5037 | 0.8060 | 1.0000 | 0.6370 | 0.8806 | 0.9630 | 0.6741 | 0.8955 | 1.0000 |        |
| T0982-D2   | TBM-hard   | 207.1    | 0.3939 | 0.5909 | 0.8077 | 0.4318 | 0.6667 | 0.9615 | 0.4697 | 0.4242 | 0.4615 |        |
| T0983-D1   | TBM-easy   | 644.8    | 0.3220 | 0.6017 | 1.0000 | 0.6483 | 0.9492 | 1.0000 | 0.8475 | 0.9576 | 1.0000 |        |
| T0984-D1   | TBM-easy   | 186.2    | 0.1012 | 0.1964 | 0.3636 | 0.0967 | 0.1631 | 0.3030 | 0.3414 | 0.5529 | 0.7803 |        |

|            |          |        |        |        |        |        |        |        |        |        |        |
|------------|----------|--------|--------|--------|--------|--------|--------|--------|--------|--------|--------|
| T0984-D2   | TBM-easy | 344.7  | 0.0408 | 0.0822 | 0.2069 | 0.0680 | 0.1370 | 0.2069 | 0.4218 | 0.5342 | 0.6897 |
| T0985-D1   | TBM-hard | 193.6  | 0.3361 | 0.5558 | 0.8690 | 0.3076 | 0.4893 | 0.7381 | 0.4323 | 0.5772 | 0.7262 |
| T0986s1-D1 | FM/TBM   | 52.2   | 0.5543 | 0.8043 | 0.9444 | 0.3913 | 0.6739 | 0.8333 | 0.3261 | 0.5217 | 0.7778 |
| T0986s2-D1 | FM       | 5.7    | 0.3419 | 0.5195 | 0.8387 | 0.3419 | 0.5714 | 0.8387 | 0.5032 | 0.6623 | 0.8387 |
| T0987-D1   | FM       | 3.5    | 0.2595 | 0.4783 | 0.8378 | 0.2865 | 0.4457 | 0.7027 | 0.7081 | 0.8804 | 0.9189 |
| T0987-D2   | FM       | 3.3    | 0.2029 | 0.2913 | 0.4390 | 0.2609 | 0.4563 | 0.7073 | 0.4928 | 0.7670 | 0.8293 |
| T0989-D1   | FM       | 1.7    | 0.2985 | 0.3731 | 0.6538 | 0.3284 | 0.5970 | 0.9231 | 0.2537 | 0.4328 | 0.8462 |
| T0989-D2   | FM       | 1.9    | 0.2679 | 0.4107 | 0.6818 | 0.3125 | 0.5000 | 0.7727 | 0.1339 | 0.2143 | 0.2273 |
| T0990-D1   | FM       | 4.0    | 0.2105 | 0.4211 | 0.6667 | 0.3026 | 0.4211 | 0.6000 | 0.3684 | 0.4737 | 0.5333 |
| T0990-D2   | FM       | 2.3    | 0.0946 | 0.1712 | 0.3750 | 0.1059 | 0.1802 | 0.4205 | 0.1937 | 0.2748 | 0.4091 |
| T0990-D3   | FM       | 2.4    | 0.2582 | 0.3491 | 0.5476 | 0.1549 | 0.2453 | 0.3095 | 0.2864 | 0.4245 | 0.6190 |
| T0991-D1   | FM       | 0.3    | 0.2966 | 0.4237 | 0.5217 | 0.3983 | 0.5254 | 0.6957 | 0.1525 | 0.1525 | 0.1304 |
| T0992-D1   | FM/TBM   | 179.4  | 0.5607 | 0.9245 | 1.0000 | 0.6355 | 0.8491 | 0.9524 | 0.7383 | 0.9057 | 1.0000 |
| T0993s1-D1 | TBM-easy | 2441.1 | 0.3384 | 0.6107 | 1.0000 | 0.3574 | 0.6183 | 0.9231 | 0.8365 | 0.9542 | 0.9808 |
| T0993s2-D1 | TBM-easy | 1548.8 | 0.1429 | 0.2245 | 0.1579 | 0.2449 | 0.2041 | 0.2632 | 0.7347 | 0.8571 | 1.0000 |
| T0995-D1   | TBM-easy | 632.4  | 0.3197 | 0.5918 | 0.8966 | 0.3707 | 0.6190 | 0.9138 | 0.8367 | 0.9660 | 0.9828 |
| T0996-D1   | TBM-easy | 362.5  | 0.2617 | 0.4906 | 0.9048 | 0.4019 | 0.7358 | 1.0000 | 0.7290 | 0.9245 | 1.0000 |
| T0996-D2   | TBM-easy | 332.7  | 0.2520 | 0.4921 | 0.8400 | 0.3307 | 0.6508 | 0.9200 | 0.8110 | 0.9841 | 1.0000 |
| T0996-D3   | TBM-easy | 375.0  | 0.2500 | 0.4400 | 0.8500 | 0.4500 | 0.7800 | 0.9000 | 0.7000 | 0.8800 | 1.0000 |
| T0996-D4   | TBM-easy | 55.8   | 0.2857 | 0.5000 | 0.9231 | 0.3383 | 0.5758 | 1.0000 | 0.7820 | 0.9091 | 1.0000 |
| T0996-D5   | TBM-easy | 216.3  | 0.2645 | 0.5000 | 0.9167 | 0.3636 | 0.6500 | 0.9167 | 0.6364 | 0.8000 | 0.8750 |
| T0996-D6   | TBM-easy | 233.3  | 0.3365 | 0.5962 | 0.9500 | 0.4519 | 0.7500 | 1.0000 | 0.7885 | 0.9231 | 1.0000 |
| T0996-D7   | TBM-easy | 201.1  | 0.2429 | 0.4429 | 0.7500 | 0.3071 | 0.5857 | 1.0000 | 0.7571 | 0.9429 | 1.0000 |
| T0997-D1   | FM/TBM   | 172.5  | 0.3514 | 0.5543 | 0.8649 | 0.5838 | 0.7935 | 0.8919 | 0.7135 | 0.8478 | 0.9459 |
| T0998-D1   | FM       | 0.7    | 0.2289 | 0.4217 | 0.6061 | 0.3916 | 0.5904 | 0.8182 | 0.1988 | 0.2048 | 0.0909 |
| T0999-D1   | NE       | 11.1   | 0.2642 | 0.4767 | 0.7922 | 0.2746 | 0.5026 | 0.8052 | 0.8549 | 0.9845 | 1.0000 |
| T0999-D2   | TBM-hard | 10.3   | 0.2804 | 0.5354 | 0.9333 | 0.3620 | 0.6150 | 0.8667 | 0.8499 | 0.9381 | 0.9667 |
| T0999-D3   | TBM-easy | 16.3   | 0.1667 | 0.2778 | 0.5000 | 0.1000 | 0.1778 | 0.2778 | 0.4444 | 0.4778 | 0.5833 |
| T0999-D4   | TBM-easy | 321.3  | 0.2623 | 0.4508 | 0.7500 | 0.3320 | 0.5656 | 0.8958 | 0.7992 | 0.9344 | 1.0000 |
| T0999-D5   | TBM-easy | 295.7  | 0.2222 | 0.4236 | 0.8070 | 0.4306 | 0.7569 | 0.9825 | 0.8611 | 0.9792 | 1.0000 |
| T1000-D1   | NE       | 297.0  | 0.3855 | 0.7561 | 1.0000 | 0.6747 | 0.9512 | 1.0000 | 0.8554 | 0.9756 | 1.0000 |
| T1000-D2   | FM       | 186.7  | 0.1717 | 0.3302 | 0.6395 | 0.3132 | 0.5860 | 0.8721 | 0.7935 | 0.9209 | 0.9651 |
| T1001-D1   | FM       | 2.0    | 0.3309 | 0.5507 | 0.7407 | 0.4317 | 0.6087 | 0.8148 | 0.2590 | 0.3478 | 0.2593 |
| T1002-D1   | TBM-easy | 410.7  | 0.5763 | 1.0000 | 1.0000 | 0.6610 | 0.8966 | 1.0000 | 0.7288 | 0.7241 | 0.7273 |
| T1002-D2   | TBM-easy | 410.7  | 0.6271 | 1.0000 | 1.0000 | 0.6102 | 0.8966 | 1.0000 | 0.5424 | 0.7931 | 1.0000 |
| T1002-D3   | TBM-easy | 262.9  | 0.4236 | 0.7361 | 1.0000 | 0.4861 | 0.8194 | 1.0000 | 0.8681 | 0.9861 | 1.0000 |
| T1003-D1   | TBM-easy | 1508.2 | 0.3204 | 0.4725 | 0.7701 | 0.2563 | 0.4358 | 0.7011 | 0.7437 | 0.9450 | 0.9770 |
| T1004-D1   | TBM-easy | 35.2   | 0.4186 | 0.7442 | 1.0000 | 0.8256 | 1.0000 | 1.0000 | 0.3256 | 0.4419 | 0.7059 |
| T1004-D2   | TBM-easy | 37.2   | 0.4805 | 0.8421 | 1.0000 | 0.8442 | 0.9211 | 1.0000 | 0.1688 | 0.2895 | 0.6000 |
| T1004-D3   | NE       | 3.0    | 0.2609 | 0.3826 | 0.5435 | 0.4130 | 0.5130 | 0.8043 | 0.1609 | 0.1739 | 0.1522 |
| T1005-D1   | FM/TBM   | 261.6  | 0.1779 | 0.2638 | 0.3846 | 0.1534 | 0.2577 | 0.5077 | 0.6687 | 0.8712 | 0.9385 |
| T1006-D1   | TBM-easy | 897.9  | 0.2468 | 0.5000 | 0.9333 | 0.5714 | 0.9474 | 1.0000 | 0.8701 | 0.9737 | 1.0000 |
| T1008-D1   | FM/TBM   | 0.1    | 0.3506 | 0.5263 | 0.8000 | 0.2078 | 0.3158 | 0.4000 | 0.3506 | 0.5526 | 0.5333 |
| T1009-D1   | TBM-hard | 262.9  | 0.3705 | 0.5794 | 0.8322 | 0.2813 | 0.5125 | 0.8112 | 0.8008 | 0.9164 | 0.9860 |
| T1010-D1   | FM       | 20.4   | 0.2381 | 0.3905 | 0.5952 | 0.4143 | 0.6381 | 0.8095 | 0.5333 | 0.6762 | 0.7619 |
| T1011-D1   | TBM-hard | 227.9  | 0.0558 | 0.1116 | 0.1935 | 0.0515 | 0.1030 | 0.2151 | 0.5193 | 0.7511 | 0.9462 |
| T1011-D2   | NE       | 144.9  | 0.3750 | 0.6125 | 0.9688 | 0.3125 | 0.5125 | 0.7188 | 0.5250 | 0.7500 | 0.9375 |
| T1013-D1   | TBM-easy | 316.0  | 0.0846 | 0.1653 | 0.3617 | 0.0825 | 0.1653 | 0.4043 | 0.5137 | 0.7458 | 0.8723 |
| T1014-D1   | TBM-easy | 1007.0 | 0.2453 | 0.4810 | 0.8387 | 0.3962 | 0.7089 | 0.8710 | 0.8428 | 0.9620 | 1.0000 |
| T1014-D2   | TBM-easy | 4383.8 | 0.2735 | 0.4310 | 0.7391 | 0.5214 | 0.6379 | 0.8261 | 0.5897 | 0.7069 | 0.8261 |
| T1015s1-D1 | FM       | 43.9   | 0.4318 | 0.7955 | 1.0000 | 0.2614 | 0.5000 | 0.8235 | 0.5114 | 0.8409 | 1.0000 |
| T1015s2-D1 | TBM-hard | 62.8   | 0.3178 | 0.5781 | 0.8800 | 0.3798 | 0.7188 | 0.9200 | 0.5891 | 0.8438 | 0.9600 |
| T1016-D1   | TBM-easy | 1340.9 | 0.2624 | 0.5050 | 0.8750 | 0.4307 | 0.7228 | 1.0000 | 0.8564 | 0.9703 | 1.0000 |
| T1017s1-D1 | TBM-easy | 25.5   | 0.2000 | 0.3636 | 0.6364 | 0.2545 | 0.4545 | 0.8182 | 0.4545 | 0.6909 | 0.9545 |
| T1017s2-D1 | FM       | 14.7   | 0.4297 | 0.6094 | 0.8400 | 0.5781 | 0.9062 | 1.0000 | 0.3203 | 0.4375 | 0.7200 |
| T1018-D1   | TBM-easy | 386.9  | 0.2395 | 0.4431 | 0.7273 | 0.3443 | 0.6168 | 0.8182 | 0.8473 | 0.9521 | 0.9848 |
| T1019s1-D1 | FM/TBM   | 254.7  | 0.7241 | 0.8621 | 1.0000 | 0.4310 | 0.5517 | 0.9091 | 0.2069 | 0.3793 | 0.7273 |
| T1019s2-D1 | TBM-easy | 129.0  | 0.4545 | 0.7727 | 1.0000 | 0.6250 | 0.9318 | 1.0000 | 0.3409 | 0.5227 | 0.7647 |
| T1020-D1   | TBM-easy | 119.8  | 0.1056 | 0.2050 | 0.3750 | 0.1832 | 0.3602 | 0.7344 | 0.7547 | 0.9006 | 0.9844 |
| T1021s1-D1 | TBM-hard | 154.3  | 0.2483 | 0.4865 | 0.8621 | 0.4161 | 0.8108 | 1.0000 | 0.6644 | 0.8514 | 0.9655 |
| T1021s2-D1 | TBM-hard | 149.2  | 0.2350 | 0.4195 | 0.6812 | 0.2837 | 0.4598 | 0.7681 | 0.6447 | 0.7529 | 0.8696 |
| T1021s3-D1 | FM       | 330.0  | 0.1404 | 0.2360 | 0.4286 | 0.2191 | 0.4045 | 0.7714 | 0.6461 | 0.8427 | 0.8857 |
| T1021s3-D2 | FM       | 4.7    | 0.2178 | 0.4200 | 0.5500 | 0.3267 | 0.5400 | 0.6000 | 0.3960 | 0.5000 | 0.6000 |



|  |            |          |       |        |        |        |        |        |        |        |        |        |
|--|------------|----------|-------|--------|--------|--------|--------|--------|--------|--------|--------|--------|
|  | T1022s1-D1 | FM       | 436.0 | 0.2756 | 0.5128 | 0.7419 | 0.5064 | 0.8333 | 0.9677 | 0.6090 | 0.7692 | 0.8710 |
|  | T1022s1-D2 | TBM-hard | 486.3 | 0.1343 | 0.1515 | 0.3846 | 0.3582 | 0.6667 | 0.7692 | 0.5224 | 0.8485 | 0.8462 |
|  | T1022s2-D1 | TBM-hard | 132.5 | 0.3181 | 0.5725 | 0.8952 | 0.4514 | 0.7710 | 0.9619 | 0.6552 | 0.8626 | 0.9619 |
|  | Average    |          |       | 0.2894 | 0.4808 | 0.7073 | 0.3683 | 0.5597 | 0.7504 | 0.5115 | 0.6454 | 0.7538 |

\* Target type as defined by CASP13 assessors ([http://predictioncenter.org/casp13/domains\\_summary.cgi](http://predictioncenter.org/casp13/domains_summary.cgi)). NE stands for “not evaluated”. “FM/TBM”, “TBM-easy”, “TBM-hard” are all considered as TBM by this manuscript.

## Reference

1. Fox NK, Brenner SE, Chandonia J-M. SCOPe: Structural Classification of Proteins—extended, integrating SCOP and ASTRAL data and classification of new structures. *Nucleic acids research* 2013;42(D1):D304-D309.
